# Supplementary material for: A highly active nanostructured metallic oxide cathode for aprotic Li–O2batteries
Source: Royal Society of Chemistry journal article supplement (doi:10.1039/c4ee02587c), 2014-12-22
Supplement: c4ee02587c1.pdf [file c4ee02587c1.pdf]

## Supporting Information

### A Metallic Oxide with High Electrochemical Activity for Aprotic Li-O<sub>2</sub> Batteries

Dipan Kundu, Robert Black, and Linda F. Nazar\*

#### Experimental

**Material preparation:** In a typical synthesis, titanium(IV) ethoxide (Sigma Aldrich) and ethylenimine (oligomer mixture,  $M_n \sim 400$ , Sigma Aldrich) were mixed in a desired weight ratio. Ethanol/iso-propanol was added to control the viscosity of the obtained mixture, which was stirred at 75°C for overnight leading to the formation of an amber yellow color gel. The resultant gel was further dried at 100°C for 4 to 6 h, and then purged under Ar stream in a tubular flow furnace in a quartz tube for 3-4 h before firing at 860-870°C for 4 h with a heating ramp of 4°C/min. A possible reaction scheme is presented as follows:

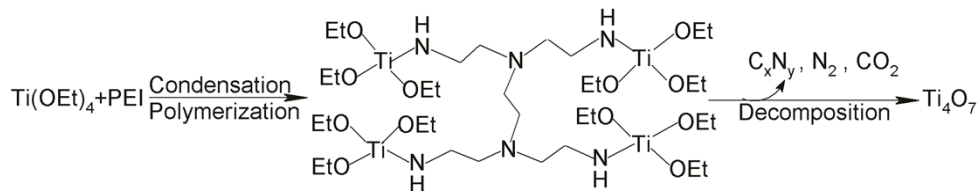

Addition of ethylenimine to titanium ethoxide triggers a condensation reaction through coordination of the imine nitrogen to the  $Ti^{4+}$  of ethoxide, leading to the formation of three dimensional polymeric networks. Calcination under inert atmosphere results in the decomposition of the polymeric gel with concomitant release of carbon dioxide, nitrogen, and  $C_xN_y$  type gases along with the formation of nanoscopic  $TiO_2$  in an amorphous carbon matrix. At higher calcination temperatures the carbothermal reduction of the  $TiO_2$  begins with the release of  $CO_2$ , resulting in the formation of porous  $Ti_4O_7$  nanomaterial. The ethylenimine to titanium(IV) ethoxide ratio is controlled to generate almost carbon free crystalline phase of  $Ti_4O_7$ .

## Physical characterizations

**XRD and Microscopy:** Powder X-ray diffraction was carried out using a Bruker D8 advance diffractometer in Bragg-Brentano geometry with  $\text{CuK}_\alpha$  ( $\lambda = 1.5405 \text{ \AA}$ ) radiation. Scanning electron microscopy (SEM) was performed on a LEO 1530 field emission SEM. Transmission electron microscopy was carried out on a FEI Titan 80-300.

**BET:** Nitrogen adsorption-desorption analysis were performed at 77 K on a Quantachrome AUTOSORB-1. The sample was outgassed for 12 hours at 200°C under vacuum line prior to this analysis. The surface area of the sample was calculated by the Brunauer Emmett Teller (BET) method by taking at least 5 data points where  $P/P_0 < 0.3$ . Pore size distribution was obtained by the Barrett–Joyner–Halenda (BJH) method applied to the desorption branch of the isotherm.

**Conductivity:** Electrical conductivity of the  $\text{Ti}_4\text{O}_7$  nanomaterial was measured on a 1.5 mm thick pellet of 12 mm in diameter, pressed with 4 ton pressure. The pellet was sintered at 400°C for 24 h under Ar flow. Electric conductivity was measured using a Jandel four-point probes connected with RM3000 test unit.

**XPS:** XPS analysis was performed on a Thermo ESCALAB 250 instrument configured with a monochromatic Al  $\text{K}\alpha$  (1486.6 eV). The air-sensitive samples were transported to the spectrometer in an Ar atmosphere and transferred into the chamber very quickly. All spectra were fitted with Gaussian-Lorentzian functions and a Shirley-type background using CasaXPS software. For the analysis of Ti 2p spectra, three constraints were used on the fitting for component pairs: peak area ratio of 1:2 for  $2p_{3/2}$ :  $2p_{1/2}$  and maximum 0.2 eV difference in full width half maximum (FWHM) with  $2p_{1/2}$  having the higher value of FWHM. The binding energy values were all calibrated using the adventitious C 1S peak at 284.8 eV.

**Electrochemistry:** Tetraethylene glycol dimethyl ether (TEGDME, Sigma Aldrich, >99%) was distilled over Na metal under vacuum and stored over activated 4 Å molecular sieves in an Ar filled glove box. Lithium- bis(trifluoromethylsulfonyl)imide (LiTFSI, Solvionic, 99%) was dried at 120°C for 4 days under vacuum which was then used to obtain desired electrolyte, 0.5 M LiTFSI in TEGDME. The water content of the electrolyte was found to be < 1 ppm (Karl-Fischer titration).

Electrochemical performance was assessed using a hermetically sealed Swagelok type cell with the cathode head space filled with dry O<sub>2</sub> (<0.5 ppm) at 1.5 atm. For cathode fabrication, an ink obtained by blending Ti<sub>4</sub>O<sub>7</sub> nanomaterial with PTFE suspension was coated on stainless steel mesh (mesh size: 100 x 100, 30% open area) of 1 cm<sup>2</sup> geometric area. The cathodes were then dried at 60°C for 1 h in air followed by 12 h at 300°C under dynamic vacuum. Typical loading of the electrodes were 3-5 mg cm<sup>-2</sup> with Ti<sub>4</sub>O<sub>7</sub> to PTFE weight ratio of 90:10. Electrochemical cells were assembled in an Ar filled glove-box (O<sub>2</sub> < 0.5 ppm, H<sub>2</sub>O < 0.5 ppm) using the 1 cm<sup>2</sup> cathode coins with Li metal foil as the anode and glass fiber (Millipore, 0.7 mm) as the separator (one). Glass fiber separators were dried at 300°C for 24 h under dynamic vacuum prior to use.

For the ex-situ analysis of the discharged and charged cathodes, cells were disassembled in an Ar filled glove-box and the electrodes were washed with dry acetonitrile (<1 ppm) and dried in a vacuum chamber. Galvanostatic cycling was performed using a BT2000 battery cycler (Arbin Instruments). All the current densities reported in this work are based on the geometric electrode area.

**Mass Spectrometry:** The residual gas analysis was performed with a modified design based on an OEMS apparatus reported by Tsiouvaras et. al (*J. Electrochem. Soc.* 160, p. A471-A477, 2013). A commercial electrochemical flow cell (EL-Cell, ECC-DEMS) is attached in-line with a gas flow controller (Bronkhurst, F-200CV) and quadrupole mass spectrometer (Standford Research Systems, RGA 200). During cell operation a controlled flow of Ar (5.0 Grade) sweeps the evolved gases from the cell to the MS entrance chamber where the gas enters the quadrupole through a fused silica capillary (50 um ID). The pressure inside the MS chamber is  $2 \times 10^{-6}$  torr during operation. Prior to measurement, the mass spectrometer is calibrated to establish a relationship between the measured ion current (A) and target gas concentration (ppm). With the use of known gas concentrations (from 2000 ppm O<sub>2</sub>/Ar balance and 2000 ppm CO<sub>2</sub>/Ar balance mixtures) mixed with different amounts of Ar, a linear relationship between the gas concentration and ion current is established. The quantification is performed with the use of Mathworks Matlab software.

For the measurements in Figure 2c and Figure 2d, cathodes were prepared in a 95:5 weight percent of active material : PTFE. The contents were spread onto a stainless steel mesh (2 cm<sup>2</sup>/100 mesh size) and dried under vacuum at 300 °C for 12 hours. The cells were assembled with 200 uL of 0.5M LiTFSI/TEGDME, two glass fiber separators and lithium metal as the

counter electrode. Discharge was performed at  $250 \mu\text{A cm}^{-2}$  for the carbon cathode and  $75 \mu\text{A cm}^{-2}$  for the  $\text{Ti}_4\text{O}_7$  cathode under 1.5 atm  $\text{O}_2$  to a fixed capacity of 1 mAh. *These values were chosen in order to provide suitable capacity for both cells, and a similar  $\text{Li}_2\text{O}_2$  morphology (thin toroids in both cases).* Charging of the cell was performed at  $250 \mu\text{A cm}^{-2}$  after a 2 hour rest period at OCV. Determination of the  $e^-/\text{O}_2$  values was determined from the total accumulated amount of  $\text{O}_2$  corresponding to voltages where  $\text{O}_2$  evolution terminated (4.2 V for  $\text{Ti}_4\text{O}_7$  and 4.5 V for VC).

For the online electrochemical mass spectrometry of the preloaded  $\text{Ti}_4\text{O}_7$  cathode, commercial  $\text{Li}_2\text{O}_2$  (Sigma Aldrich, 95% purity) was mixed with nano- $\text{Ti}_4\text{O}_7$  and PTFE suspension in isopropanol and the resultant slurry was coated on stainless steel mesh. The final composition of the cathode was  $\text{Ti}_4\text{O}_7:\text{Li}_2\text{O}_2:\text{PTFE}::8:1:2$ . The cathode was dried under vacuum overnight. The mass spectrometry cell was assembled in a similar way as described above. The cell was galvanostatically charged at a current density of  $75 \mu\text{A cm}^{-2}$ .

***Estimation of Commercial  $\text{Li}_2\text{O}_2$  Purity:*** Chemical purity of the commercial  $\text{Li}_2\text{O}_2$  (Sigma Aldrich) was assessed by iodometric titration. The iodometric titration protocol is based on oxidation of a weighed quantity of peroxide with large excess iodide solution, followed by titration of the liberated iodine with standardized thiosulfate solution. Details of this protocol have been described elsewhere.<sup>1</sup> Commercial peroxide was found to be 88% pure by this titration method, and this was used to determine the actual mass of peroxide in the preloaded cathodes.

**Table S1. Refined Lattice Parameters for Synthesized Nano-Ti<sub>4</sub>O<sub>7</sub>**

|                               |                                |
|-------------------------------|--------------------------------|
| Diffractometer:               | Bruker D8 advance              |
| Radiation                     | Cu K $\alpha$                  |
| 2 $\theta$ range              | 15-70                          |
| Step size                     | 0.0085                         |
| Sec/step                      | 4                              |
| Background                    | Chebyshev Polynomial           |
| Chemical formula              | Ti <sub>4</sub> O <sub>7</sub> |
| Space group                   | A-1                            |
| a (Å)                         | 5.6115(6)                      |
| b (Å)                         | 7.1336(6)                      |
| c (Å)                         | 12.521(2)                      |
| $\alpha$ (°)                  | 94.9759(8)                     |
| $\beta$ (°)                   | 95.2475(7)                     |
| $\gamma$ (°)                  | 108.839(6)                     |
| Cell Volume (Å <sup>3</sup> ) | 468.758(9)                     |
| Crystallite Size (nm)         | 16.33(1)                       |
| R <sub>exp</sub>              | 1.246                          |
| R <sub>p</sub> [%]            | 1.87                           |
| R <sub>wp</sub> [%]           | 2.42                           |
| $\chi^2$                      | 1.94                           |

\*Determined by Rietveld refinement of the XRD data

**Refined Lattice Parameters for Bulk Ti<sub>4</sub>O<sub>7</sub> (for comparison)<sup>2</sup>**

|              |           |
|--------------|-----------|
| a (Å)        | 5.593(1)  |
| b (Å)        | 7.125(1)  |
| c (Å)        | 12.456(3) |
| $\alpha$ (°) | 95.02(1)  |
| $\beta$ (°)  | 95.21(1)  |
| $\gamma$ (°) | 108.73(1) |

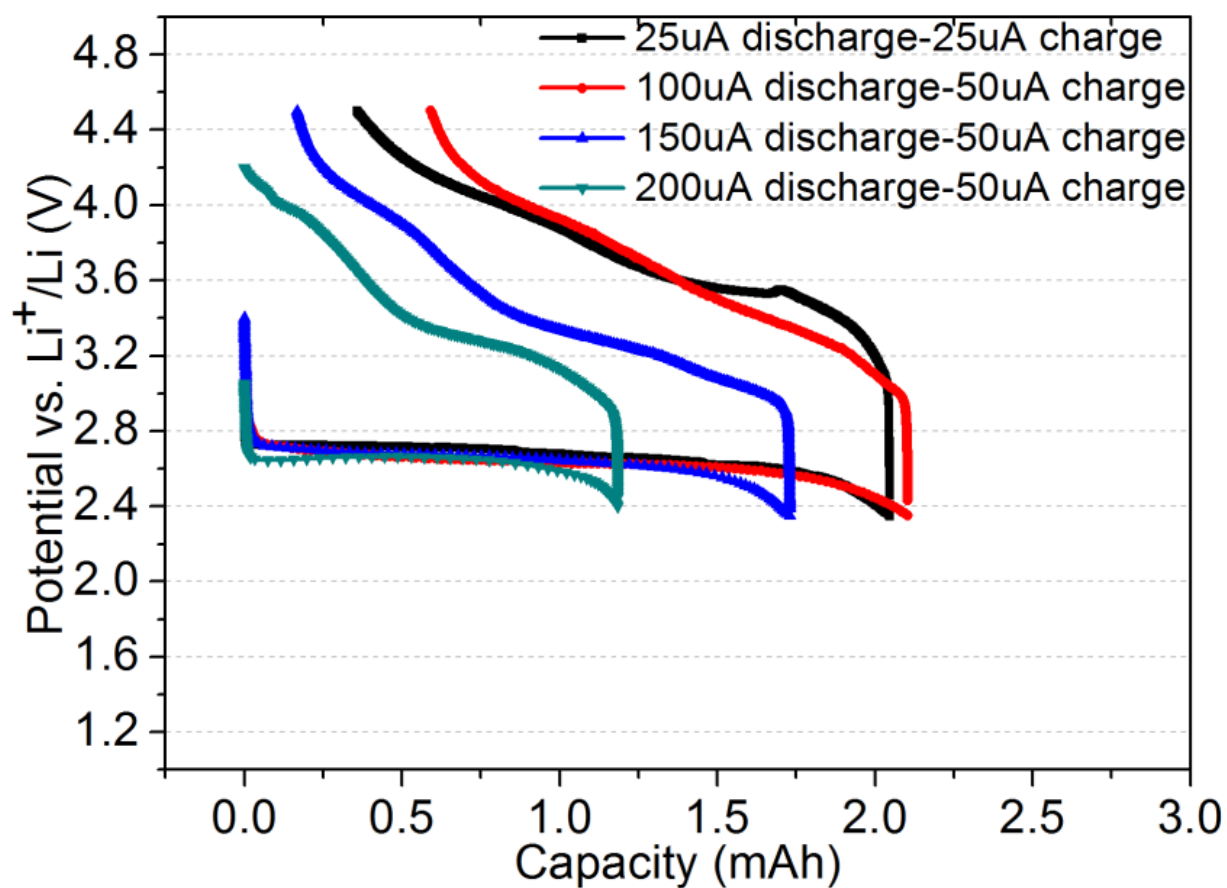

**Figure S1.** Galvanostatic cycling of the  $\text{Ti}_4\text{O}_7$  cathode at different current densities. Inset description states the discharge and charge current densities applied to obtain the different discharge-charge profiles.

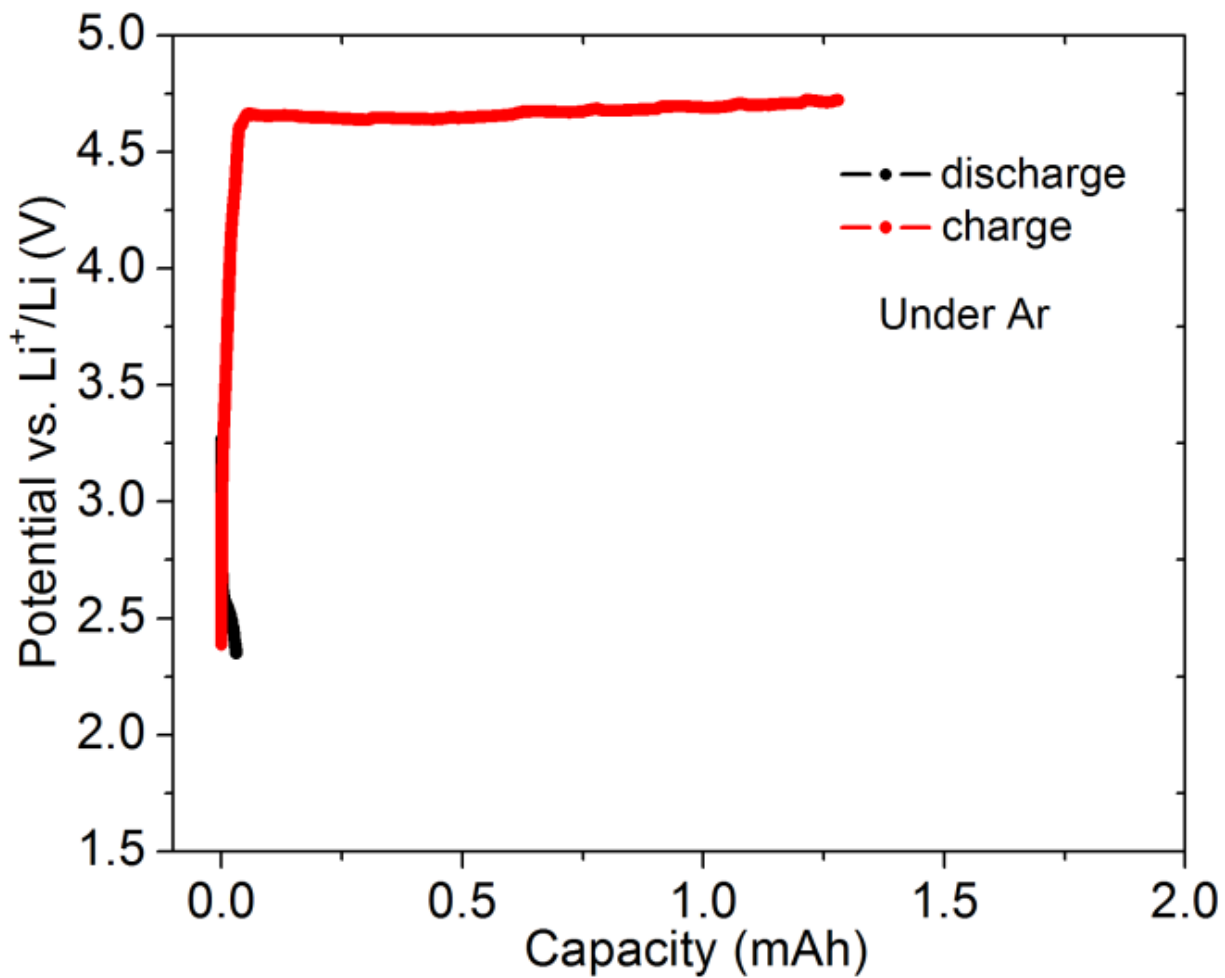

**Figure S2.** Galvanostatic discharge and charging profile of the  $\text{Ti}_4\text{O}_7$  cathode in 0.5 M LiTFSI-TEGDME electrolyte under Ar between a voltage window of 2.3-4.7V vs.  $\text{Li}^+/\text{Li}$ .

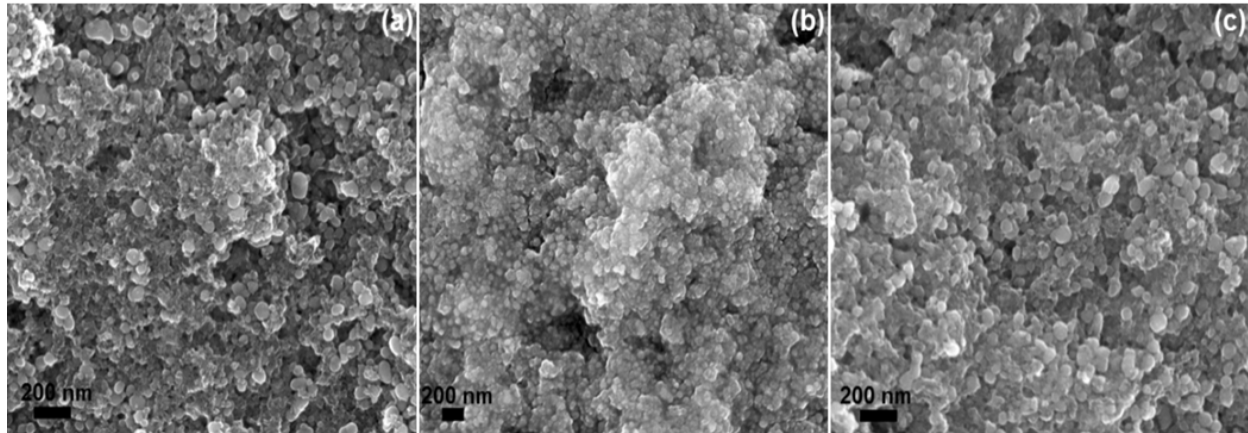

**Figure S3.** Ex-situ SEM investigations of the  $\text{Ti}_4\text{O}_7$  cathode after electrochemical discharge and charge in a  $\text{Li-O}_2$  cell. (a) SEM image of a pristine cathode showing its porous architecture; (b) cathode discharged at  $200 \text{ uA cm}^{-2}$ , illustrating the formation of the film-like  $\text{Li}_2\text{O}_2$  that fills the inter-particle pores of the cathode; (c) cathode after electrochemical charging showing the removal of the  $\text{Li}_2\text{O}_2$ .



**Table S2.** Comparison of the effect of current density on the  $\text{Li}_2\text{O}_2$  morphology formed on  $\text{Ti}_4\text{O}_7$  and VC cathode in a  $\text{Li-O}_2$  cell, in 0.5 M LiTFSI-TEGDME electrolyte. Based on the BET surface area of  $\text{Ti}_4\text{O}_7$  and VC, total available surface area on a  $1 \text{ cm}^2$  cathode has been calculated assuming an average loading of 5 mg and 1 mg of  $\text{Ti}_4\text{O}_7$  and VC, respectively. Here,  $I_{\text{Geometric}}$  is the applied current density based on geometric surface area, and  $I_{\text{Real}}$  stands for current density expressed on total available surface area per  $1 \text{ cm}^2$  cathode. The morphology of  $\text{Li}_2\text{O}_2$  formed on a VC cathode has been discussed previously by our group.<sup>3</sup>

|                      | Average Loading/cathode (g) | Geometric surface area/cathode ( $\text{m}^2$ ) | BET surface area ( $\text{m}^2/\text{g}$ ) | Total surface area/cathode ( $\text{m}^2$ ) | Geometric current density ( $\mu\text{A}/\text{cm}^2$ )/Real current density/Morphology |                              |                              |                                   |                               |  |
|----------------------|-----------------------------|-------------------------------------------------|--------------------------------------------|---------------------------------------------|-----------------------------------------------------------------------------------------|------------------------------|------------------------------|-----------------------------------|-------------------------------|--|
| <b>Ti4O7</b>         | 0.005                       | $10^{-4}$                                       | 180                                        | 0.9                                         | $I_{\text{Geometric}}$                                                                  | 25 $\mu\text{A}/\text{cm}^2$ | 50 $\mu\text{A}/\text{cm}^2$ | 100-150 $\mu\text{A}/\text{cm}^2$ | 200 $\mu\text{A}/\text{cm}^2$ |  |
|                      |                             |                                                 |                                            |                                             | $I_{\text{Real}}$                                                                       | 28 $\mu\text{A}/\text{m}^2$  | 56 $\mu\text{A}/\text{m}^2$  | 111-166 $\mu\text{A}/\text{m}^2$  | 222 $\mu\text{A}/\text{m}^2$  |  |
|                      |                             |                                                 |                                            |                                             | Morphology                                                                              | Large toroids                | Thinner toroids              | Discs/platelets                   | Film                          |  |
| <b>Vulcan Carbon</b> | 0.001                       | $10^{-4}$                                       | 219                                        | 0.219                                       | $I_{\text{Geometric}}$                                                                  | 5 $\mu\text{A}/\text{cm}^2$  | 10 $\mu\text{A}/\text{cm}^2$ | 25 $\mu\text{A}/\text{cm}^2$      | 50 $\mu\text{A}/\text{cm}^2$  |  |
|                      |                             |                                                 |                                            |                                             | $I_{\text{Real}}$                                                                       | 23 $\mu\text{A}/\text{m}^2$  | 46 $\mu\text{A}/\text{m}^2$  | 114 $\mu\text{A}/\text{m}^2$      | 228 $\mu\text{A}/\text{m}^2$  |  |
|                      |                             |                                                 |                                            |                                             | Morphology                                                                              | Large toroids                | Thinner toroids              | Discs                             | Film                          |  |

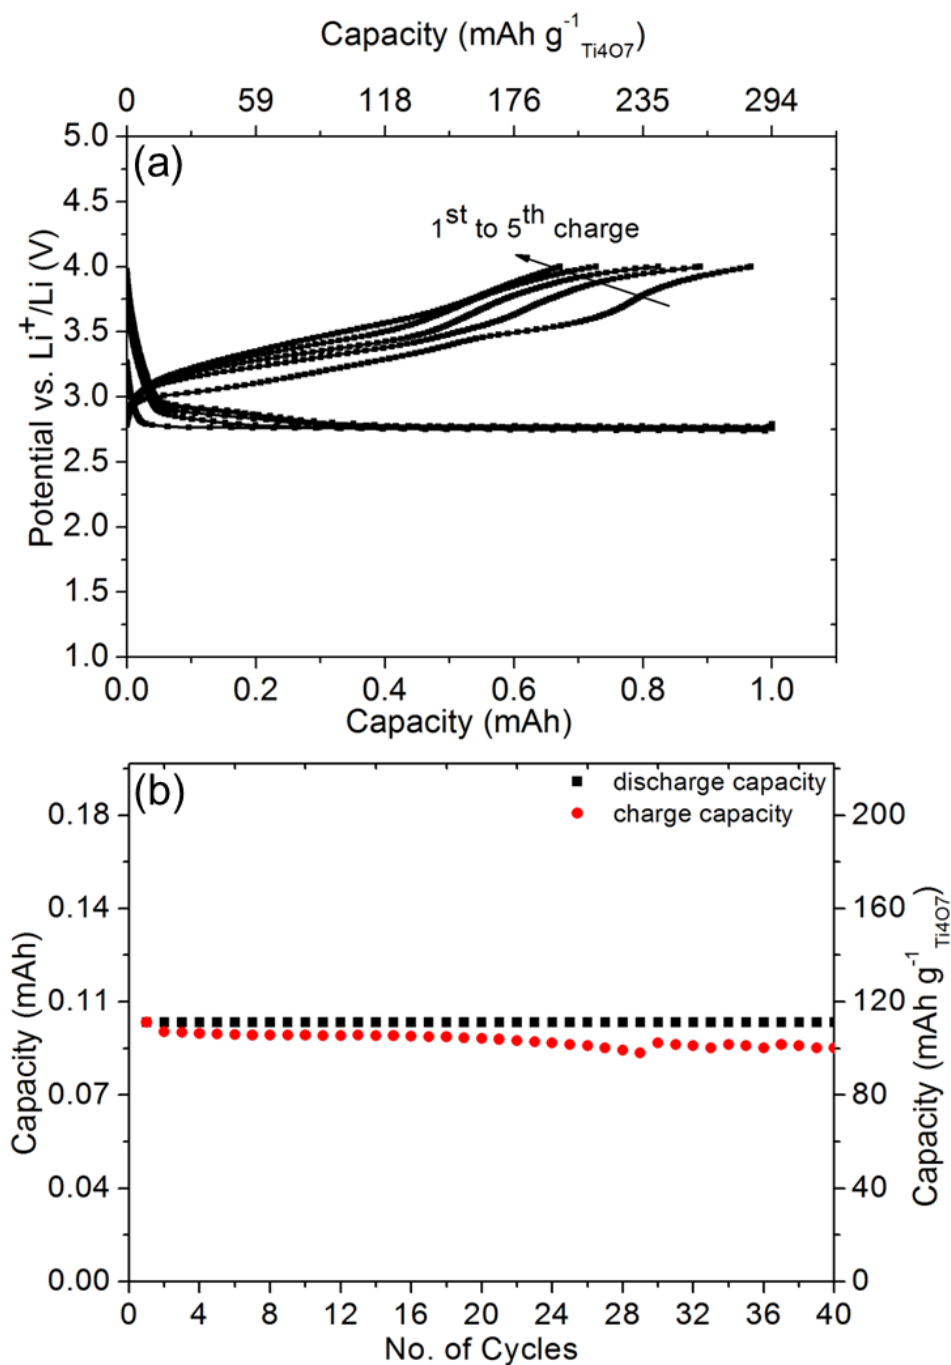

**Figure S4.** (a) galvanostatic cycling of the  $\text{Ti}_4\text{O}_7$  cathode in a  $\text{Li-O}_2$  cell with a capacity cutoff of 1 mAh in a 2.4-4 V voltage window against Li.  $200 \text{ uA cm}^{-2}$  of current density was applied for both discharge and charge. (b) galvanostatic cyclability of a  $\text{Li-O}_2$  cell employing  $\text{Ti}_4\text{O}_7$  cathode with a 0.1 mAh/ $\sim 100 \text{ mAh g}^{-1}$  capacity cutoff, cycled at  $500 \text{ uA cm}^{-2}$  current density. The cathode loading was adjusted to around  $1 \text{ mg cm}^{-2}$  to sustain a high current density.

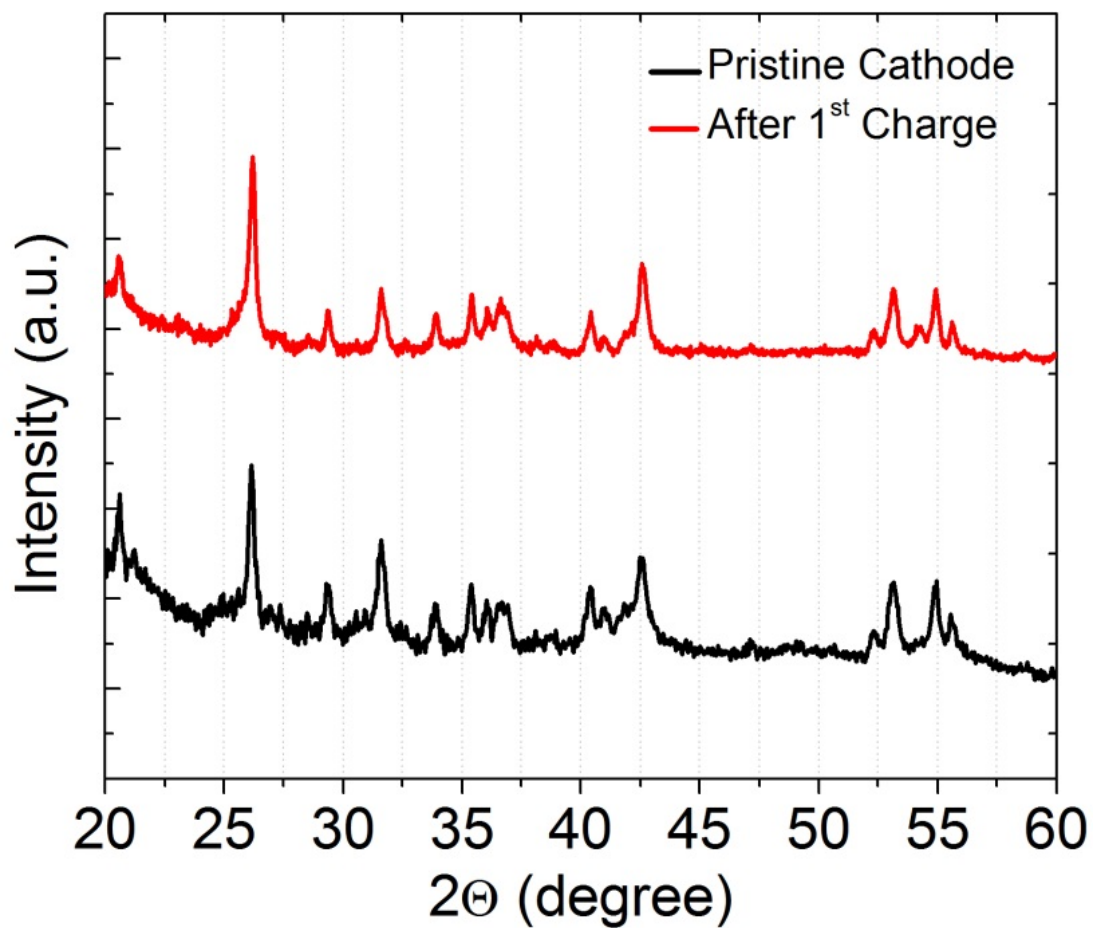

**Figure S5.** X-ray diffraction patterns of the pristine and a discharged/charged Ti<sub>4</sub>O<sub>7</sub> cathode. The unchanged XRD pattern after electrochemical cycling demonstrates the chemical inertness of the bulk Ti<sub>4</sub>O<sub>7</sub> in a Li-O<sub>2</sub> cell.

## References:

1. B. D. McCloskey, A. Valery, A. C. Luntz, S. R. Gowda, G. M. Wallraff, J. M. Garcia, T. Mori and L. E. Krupp, *J. Phys. Chem. Lett.*, 2013, **4**, 2989-2993.
2. M. Marezio, D. B. McWhan, P. D. Dernier and J. P. Remeika, *J. Solid State Chem.*, 1973, **6**, 213-221.
3. B. D. Adams, C. Radtke, R. Black, M. L. Trudeau, K. Zaghbi and L. F. Nazar, *Energy Environ. Sci.*, 2013, **6**, 1772-1778.
